# Supplementary material for: Functional analysis and binding affinity of tomato ethylene response factors provide insight on the molecular bases of plant differential responses to ethylene
Source: PubMed Central journal article supplement (PMC3548740; doi:10.1186/1471-2229-12-190), 2012-10-11

### Class A

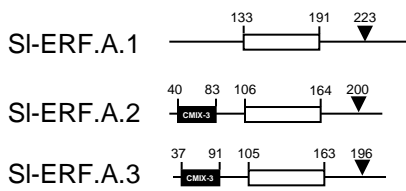

### Class E

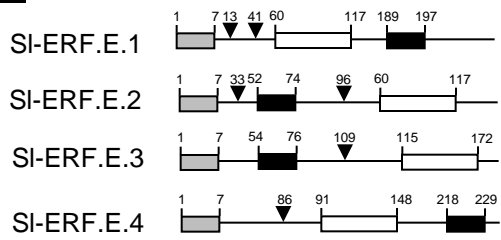

### Class B

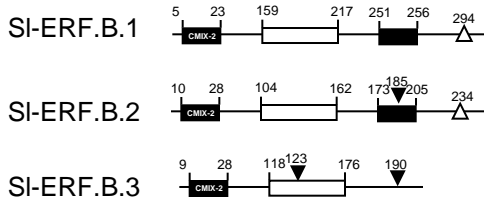

### Class F

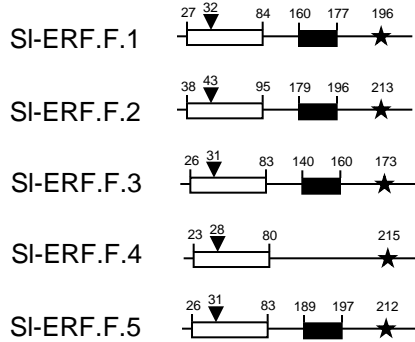

### Class C

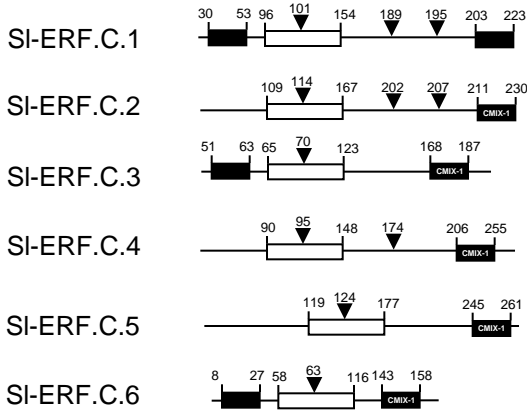

### Class G

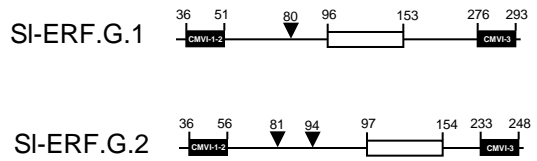

### Class D

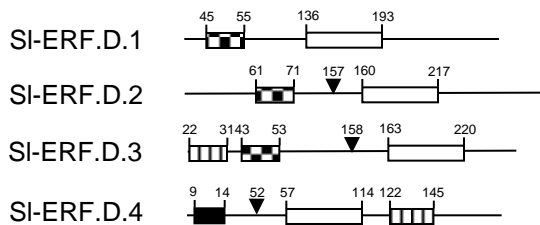

### Class H

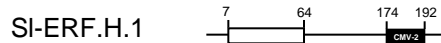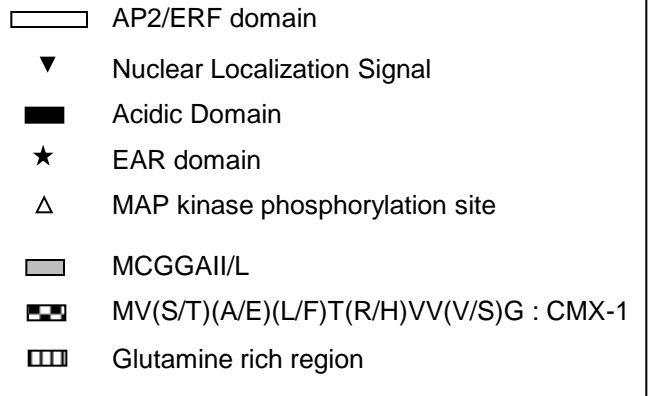

Supplement: 1471-2229-12-190-S2.pdf [file 1471-2229-12-190-S2.pdf]
