# Supplementary material for: Functional analysis and binding affinity of tomato ethylene response factors provide insight on the molecular bases of plant differential responses to ethylene
Source: PubMed Central journal article supplement (PMC3548740; doi:10.1186/1471-2229-12-190), 2012-10-11

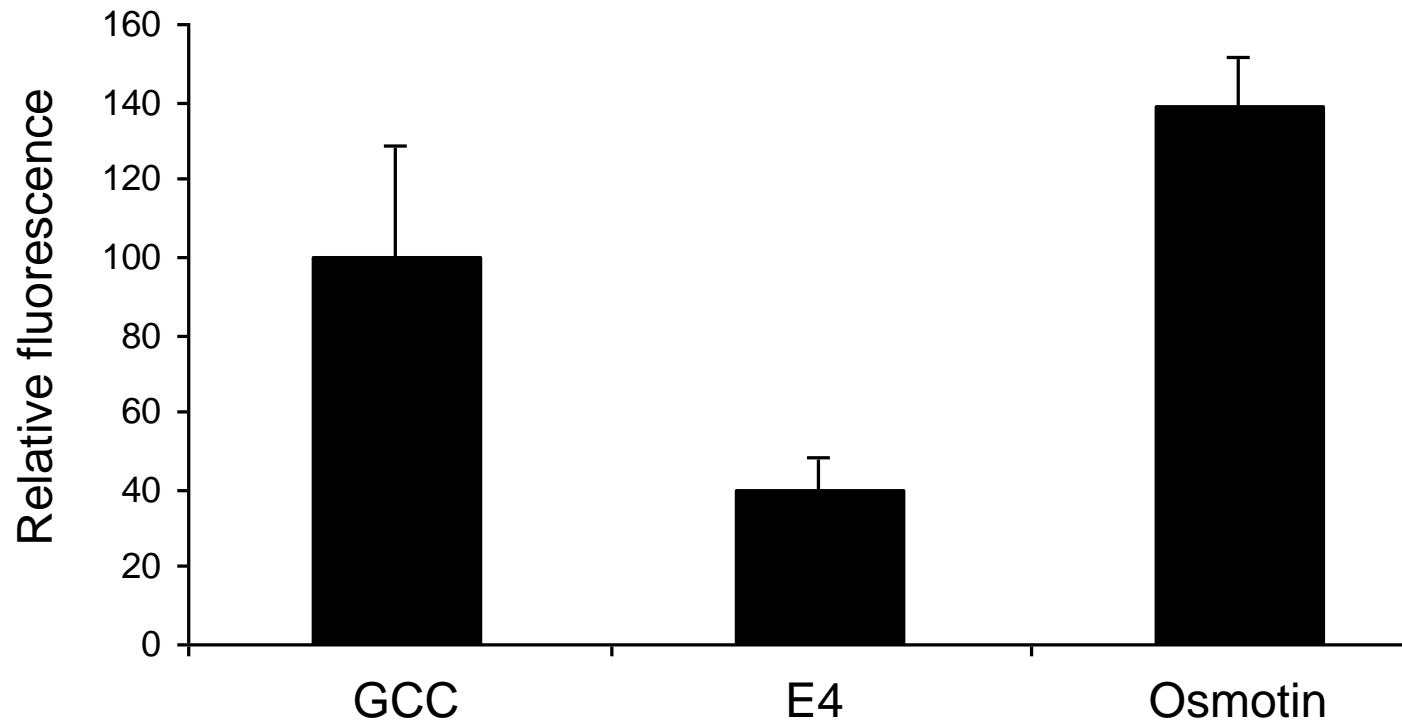

Supplement: 1471-2229-12-190-S3.pdf [file 1471-2229-12-190-S3.pdf]
